# Supplementary material for: Brain hemorrhage recurrence, small vessel disease type, and cerebral microbleeds: A meta-analysis
Source: PubMed Central journal article supplement (PMC5580863; doi:10.1212/wnl.0000000000004259), 2017-08-22
Supplement: supp_WNL.0000000000004259_Table_e-1.pdf [file supp_WNL.0000000000004259_Table_e-1.pdf]

**Table e-1: Risk of bias assessment based on key quality indicators for the included studies.**

| Study (primary author or name) | Clearly defined populations | Standardised MRI parameters | CMB clearly defined per criteria | Standardised rating scale | Standardised definition of outcome (ICH) | Completion of follow up (>90%) | Number of quality indicators |
|--------------------------------|-----------------------------|-----------------------------|----------------------------------|---------------------------|------------------------------------------|--------------------------------|------------------------------|
| PITCH study                    | +                           | +                           | +                                | +                         | +                                        | +                              | 6/6                          |
| Samarasekera et al. 2015       | +                           | +                           | +                                | +                         | +                                        | +                              | 6/6                          |
| Kang et al 2012                | +                           | +                           | +                                | +                         | +                                        | +                              | 6/6                          |
| Imaizumi et al 2012            | -                           | +                           | +                                | +                         | +                                        | +                              | 5/6                          |
| Jeon et al 2007                | +                           | +                           | +                                | +                         | +                                        | -                              | 5/6                          |
| Naka et al 2006                | +                           | +                           | +                                | +                         | +                                        | +                              | 6/6                          |
| Imaizumi et al 2004            | -                           | +                           | +                                | +                         | +                                        | +                              | 5/6                          |
| Charidimou et al 2013          | +                           | +                           | +                                | +                         | +                                        | +                              | 6/6                          |
| Domingues-Montanari et al 2011 | +                           | +                           | +                                | +                         | +                                        | +                              | 6/6                          |
| Biffi et al 2010               | +                           | +                           | +                                | +                         | +                                        | +                              | 6/6                          |

+ = present; - = absent; ? = unavailable. CMB – cerebral microbleed; ICH-intracerebral hemorrhage
